# Supplementary material for: A magnet-actuated microfluidic array chip for high-throughput pretreatment and amplification and detection of multiple pathogens
Source: Royal Society of Chemistry journal article supplement (doi:10.1039/d2an00430e), 2022-01-01
Supplement: d2an00430e1.pdf [file d2an00430e1.pdf]

**Supporting information for**

**Magnet-actuated microfluidic array chip for high-throughput pretreatment,  
amplification and detection of multiple pathogens**

Mengfan Zhou<sup>§, a</sup>, Huiying Su<sup>§, b, a</sup>, Bangfeng Wang<sup>a</sup>, Chao Wan<sup>a</sup>, Wei Du<sup>a</sup>,  
Peng Chen<sup>\*, a</sup>, Xiaojun Feng<sup>\*, a</sup>, Bi-Feng Liu<sup>a</sup>

*<sup>a</sup>The Key Laboratory for Biomedical Photonics of MOE at Wuhan National Laboratory for Optoelectronics - Hubei Bioinformatics & Molecular Imaging Key Laboratory, Systems Biology Theme, Department of Biomedical Engineering, College of Life Science and Technology, Huazhong University of Science and Technology, Wuhan 430074, China*

*<sup>b</sup>School of Biological engineering, Huainan Normal University, Huainan, Anhui 232038, China*

---

§These authors contributed equally to this work.

\* Corresponding author

Add: Systems Biology Theme, Department of Biomedical Engineering

College of Life Science and Technology

Huazhong University of Science and Technology, Wuhan 430074, China

Email: xfeng@mail.hust.edu.cn

gwchenpeng@mail.hust.edu.cn

Tel: +86-27-87793180

Fax: +86-27-87792170

Table S1 Sequences of the specific genes used for pathogen detection in this paper

| Bacteria                    | Target Gene  | GeneBnak Accession | Sequences (5'-3')           |
|-----------------------------|--------------|--------------------|-----------------------------|
| <i>Escherichia coli</i>     | <i>mal B</i> | J01648             | GCCATCTCCTGATGACGCATAGTCAGC |
|                             |              |                    | CCATCATGAATGTTGCTGTCGATGACA |
|                             |              |                    | GGTTGTTACAAAGGGAGAAGGGCATG  |
|                             |              |                    | GCGAGCGTACAGCTGCAAAATGTAAC  |
|                             |              |                    | GAAAGCCTGGGGCGAGGTCGTGGTAT  |
|                             |              |                    | CGAAAGATATCAATCTCGATATCCAT  |
|                             |              |                    | GAAGGTGAATTCGTGGTGTTTGTCGG  |
|                             |              |                    | ACCGTCTGGCTGCGGTAAAT        |
|                             |              |                    | GGCGATATTGGTGTTTATGGGGTCGTT |
|                             |              |                    | CTACATTGACAGAATCCTCAGTTTTTC |
|                             |              |                    | AACGTTTCCTGCGGTACTGTTAATTAC |
|                             |              |                    | CACGCTCTTTCGTCTGGCATTATCGAT |
|                             |              |                    | CAGTACCAGTCGTCTTATCTTGATTGA |
|                             |              |                    | AGCCGATGCCGGTGAAATTATCGCCA  |
|                             |              |                    | CGTTCGGGCAATTCGTTATTGGCGATA |
| GCCTGGCGGTGGGTTTTGTTGTCTTCT |              |                    |                             |
| CTATTGTCACCGTGGTCCAGTTTATCG |              |                    |                             |
|                             |              |                    | TT                          |

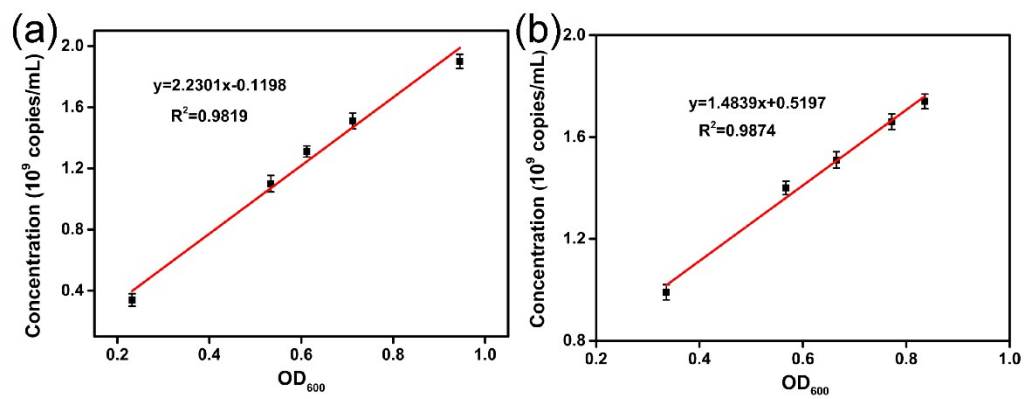

**Figure S1.** The Standard curve of bacteria. (a) *Salmonella typhimurium*. (b) *Escherichia coli*.

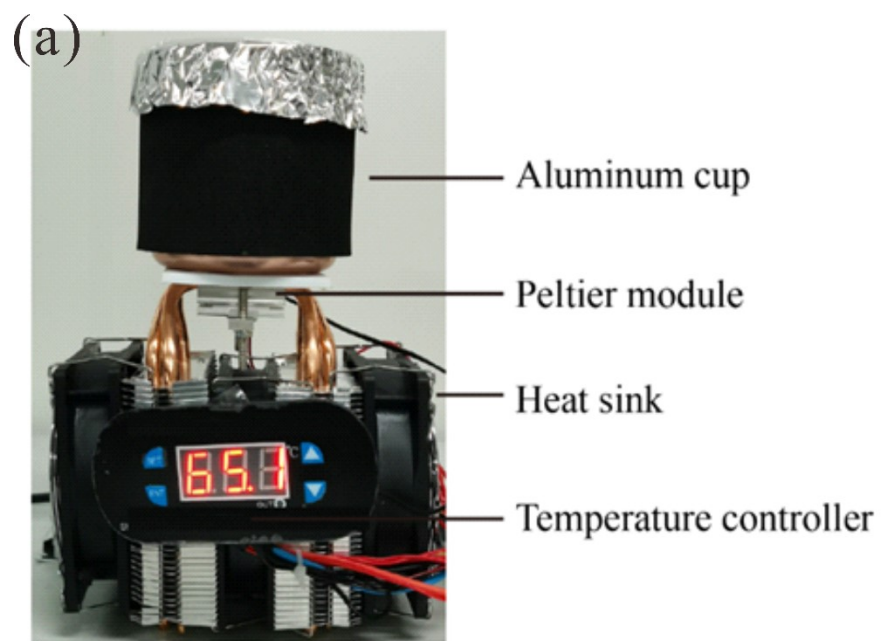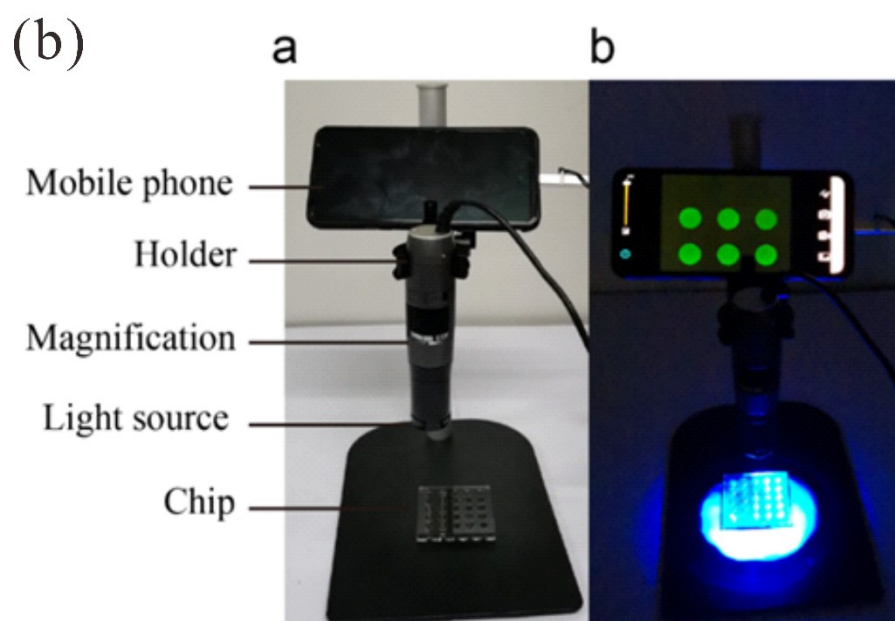

**Figure S2.** (a) Miniature peltier heater setup. (b) Chip imaging device.

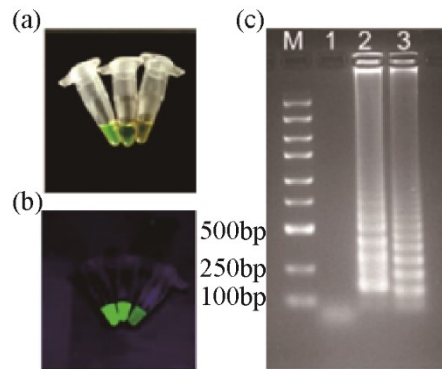

**Figure S3.** LAMP test for PDMS compatibility. (a) Left to right (bright field): Amplification result with mixing layer, amplification result with mixed layer-free and blank control. (b) Dark field image under UV excitation. (c) Electrophoresis of LAMP reaction. Lane M: DNA marker, lane 1: Blank control, lane 2: Amplification result with mixing layer. lane3: Amplification result mixed without mixed layer.

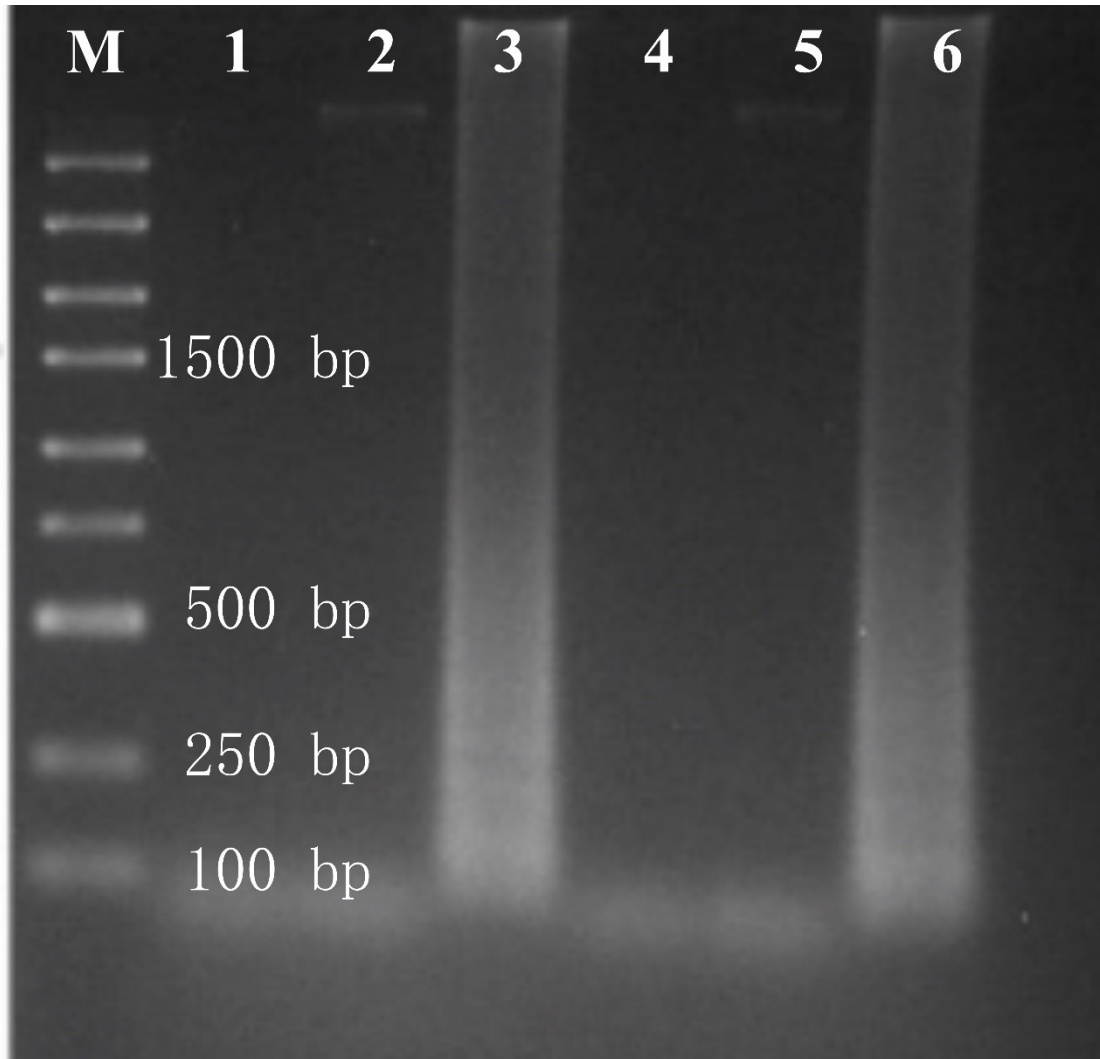

**Figure S4.** Specificity of LAMP reaction in the amplification tube. lane M: DNA marker, lane 1-3: *invA* primer test results. Lane 1: blank control, lane 2: *malB* template, lane 3: *invA* template. Lane 4-6: *malB* primer test results. Lane 4: blank control, lane 5: *invA* template, lane 6: *malB* template.
